# Supplementary material for: Size and morphology control over MOF-74 crystals
Source: Royal Society of Chemistry journal article supplement (doi:10.1039/d4ra03943b), 2024-01-01
Supplement: d4ra03943b1.pdf [file d4ra03943b1.pdf]

## Supporting Information

### Size and Morphology Control over MOF-74 Crystals

Chunhui Wu, \*<sup>a</sup> Xinxin Chu, <sup>a</sup> Xiaoling Wu, <sup>a, b</sup> He Zhou, <sup>a</sup> Youshi Zeng, <sup>a</sup> Dongxu Wang, <sup>c</sup> Wei Liu <sup>a, b</sup>

<sup>a</sup> Shanghai Institute of Applied Physics, Chinese Academy of Sciences, Shanghai, China 201800

<sup>b</sup> Wuwei Institute of Advanced Energy, Gansu Province, China 733099

<sup>c</sup> School of Physical Science and Technology, ShanghaiTech University, Shanghai 201210,  
People's Republic of China.

\* Email: [wuchunhui@sinap.ac.cn](mailto:wuchunhui@sinap.ac.cn)

## **Section S1. Materials**

2,5-Dihydroxyterephthalic acid (DOT, Tokyo Chemical Industry, 98%), magnesium (II) nitrate hexahydrate ( $\text{Mg}(\text{NO}_3)_2 \cdot 6\text{H}_2\text{O}$ , Adamas, 99.999%), acetic acid glacial (HOAC, Greagent, 99.5%), formic acid ( $\text{HCOOH}$ , Alfa Aesar, 98%), chloroacetic acid ( $\text{ClCH}_2\text{COOH}$ , Adamas, 98%), sodium hydroxide ( $\text{NaOH}$ , Aladdin, 96%), Pyridine (Adamas, 99.5%), N,N-dimethylformamide (DMF, Greagent, 99.5%), ethanol (Greagent, 99.7%), and anhydrous methanol (Greagent, 99.5%) were purchased from the mentioned sources and used without further purification.

## **Section S2. Synthesis**

### **Synthesis of Mg-MOF-74 with various molar ratio of ligand and metal salt**

The solution for Mg-MOF-74 was prepared by dissolving a mixture of  $\text{Mg}(\text{NO}_3)_2 \cdot 6\text{H}_2\text{O}$  (461.52 mg, 1.8 mmol) and 0.6/0.3/0.2 mmol DOT (118.89/59.45/39.63 mg) under sonication in a 1:1:1 (v/v/v) mixture of DMF (5.5 mL), ethanol (5.5 mL), and deionized water (5.5 mL). This mixture solution was defined as the standard solution. 5 equiv. of HOAC (1 mmol) with respect to DOT was added to the solution under stirring. Then NaOH aqueous was used as pH regulator to adjust pH value of reaction solution to  $9.55 \pm 0.05$  at room temperature for reaction solution. The prepared solution was transferred to 20 mL reaction vessels. Then, the reaction vessel was fixed in the microwave reactor (Biotage Initiator+) and reacted at 100 °C for 90 min with stirring (600 rpm). After the reaction, the as-synthesized yellow materials were washed with DMF and anhydrous methanol for three times.

### **Synthesis of Mg-MOF-74 with various amounts of water**

The solution for Mg-MOF-74 was prepared by dissolving a mixture of  $\text{Mg}(\text{NO}_3)_2 \cdot 6\text{H}_2\text{O}$  (461.52 mg, 1.8 mmol) and DOT (39.63 mg, 0.2 mmol) under sonication in a mixture of DMF (5.5 mL), ethanol (5.5 mL), and deionized water (0/1/3/5.5/7.5/8.5/9.5/13 mL). This mixture solution was defined as the standard solution. 5 equiv. of HOAC (1 mmol) with respect to DOT was added to the solution under stirring. Then NaOH aqueous was used as pH regulator to adjust pH value of reaction solution to  $9.55 \pm 0.05$  at room temperature for reaction solution. The prepared solution was transferred to 20 mL reaction vessels. Then, the reaction vessel was fixed in the microwave reactor (Biotage Initiator+) and reacted at 100 °C for 90 min with stirring (600 rpm). After the reaction, the as-synthesized yellow materials were washed with DMF and anhydrous methanol for three times.

### **Synthesis of Mg-MOF-74 with the absences of DMF or ethanol**

The solution for Mg-MOF-74 was prepared by dissolving a mixture of  $\text{Mg}(\text{NO}_3)_2 \cdot 6\text{H}_2\text{O}$  (461.52 mg, 1.8 mmol) and DOT (39.63 mg, 0.2 mmol) under sonication in a mixture of ethanol (5.5 mL) and deionized water (5.5 mL), or a mixture of DMF (5.5 mL) and deionized water (5.5 mL). This mixture solution was defined as the standard solution. 5 equiv. of HOAC (1 mmol) with respect to DOT was added to the solution under stirring. Then NaOH aqueous was used as pH regulator to adjust pH value of reaction solution to  $9.55 \pm 0.05$  at room temperature for reaction solution. The prepared solution was transferred to 20 mL reaction vessels. Then, the reaction vessel was fixed in the microwave reactor (Biotage Initiator+) and reacted at 100 °C for 90 min with stirring (600 rpm). After the reaction, the as-synthesized yellow materials were washed with DMF and anhydrous methanol for three times.

### **Synthesis of Mg-MOF-74 with capping agents of various acidity**

The solution for Mg-MOF-74 was prepared by dissolving a mixture of  $\text{Mg}(\text{NO}_3)_2 \cdot 6\text{H}_2\text{O}$  (461.52 mg, 1.8 mmol) and DOT (39.63 mg, 0.2 mmol) under sonication in a 1:1:1 (v/v/v) mixture of DMF (5.5 mL), ethanol (5.5 mL), and deionized water (5.5 mL). 3 equiv. of HOAC/HCOOH/ $\text{ClCH}_2\text{COOH}$  (0.6 mmol) with respect to DOT was added to the solution under stirring. Then NaOH aqueous was used as pH regulator to adjust pH value of reaction solution to  $9.55 \pm 0.05$  at room temperature for reaction solution. The prepared solution was transferred to 20 mL reaction vessels. Then, the reaction vessel was fixed in the microwave reactor (Biotage Initiator+) and reacted at 100 °C for 90 min with stirring (600 rpm). After the reaction, the as-synthesized yellow materials were washed with DMF and anhydrous methanol for three times.

### **Synthesis of Mg-MOF-74 with various amounts of $\text{ClCH}_2\text{COOH}$**

The solution for Mg-MOF-74 was prepared by dissolving a mixture of  $\text{Mg}(\text{NO}_3)_2 \cdot 6\text{H}_2\text{O}$  (461.52 mg, 1.8 mmol) and DOT (39.63 mg, 0.2 mmol) under sonication in a 1:1:1 (v/v/v) mixture of DMF (5.5 mL), ethanol (5.5 mL), and deionized water (5.5 mL). 3/4/5 equiv. of  $\text{ClCH}_2\text{COOH}$  (0.6/0.8/1 mmol) with respect to DOT was added to the solution under stirring. Then NaOH aqueous was used as pH regulator to adjust pH value of reaction solution to  $9.55 \pm 0.05$  at room temperature for reaction solution. The prepared solution was transferred to 20 mL reaction vessels. Then, the reaction vessel was fixed in the microwave reactor (Biotage Initiator+) and reacted at 100 °C for 90 min with stirring (600 rpm). After the reaction, the as-synthesized yellow materials were washed with DMF and anhydrous methanol for three times.

### **Synthesis of Mg-MOF-74 with various amounts of pyridine**

The solution for Mg-MOF-74 was prepared by dissolving a mixture of  $\text{Mg}(\text{NO}_3)_2 \cdot 6\text{H}_2\text{O}$  (461.52 mg, 1.8 mmol) and DOT (39.63 mg, 0.2 mmol) under sonication in a 1:1:1 (v/v/v) mixture of DMF (5.5 mL), ethanol (5.5 mL), and deionized water (5.5 mL). 0/5/25/50 equiv. of pyridine (0/1/5/10 mmol) with respect to DOT was added to the solution under stirring. Then NaOH aqueous was used as pH regulator to adjust pH value of reaction solution to  $9.55 \pm 0.05$  at room temperature for reaction solution. The prepared solution was transferred to 20 mL reaction vessels. Then, the reaction vessel was fixed in the microwave reactor (Biotage Initiator+) and reacted at 100 °C for 90 min with stirring (600 rpm). After the reaction, the as-synthesized yellow materials were washed with DMF and anhydrous methanol for three times.

### **Section S3. Characterization**

Scanning electron microscope (SEM) images were acquired on a JEOL JSM 7800F Prime SEM. Powder X-ray diffraction patterns (PXRD) were acquired on a Bruker D8 Advance diffractometer with  $\text{Cu K}\alpha$  radiation. The pH values were measured with a Mettler Toledo Seven Compact S210 pH meter.

Section S4. Supplemental figures and tables

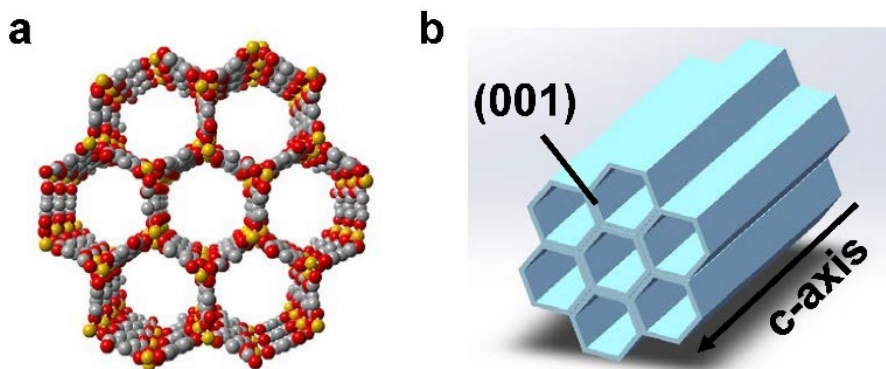

**Figure S1.** Perspective view of the three-dimensional (3D) open framework of MOF-74 along the c-axis (a) and 1-D hexagonal channel of MOF-74(b).

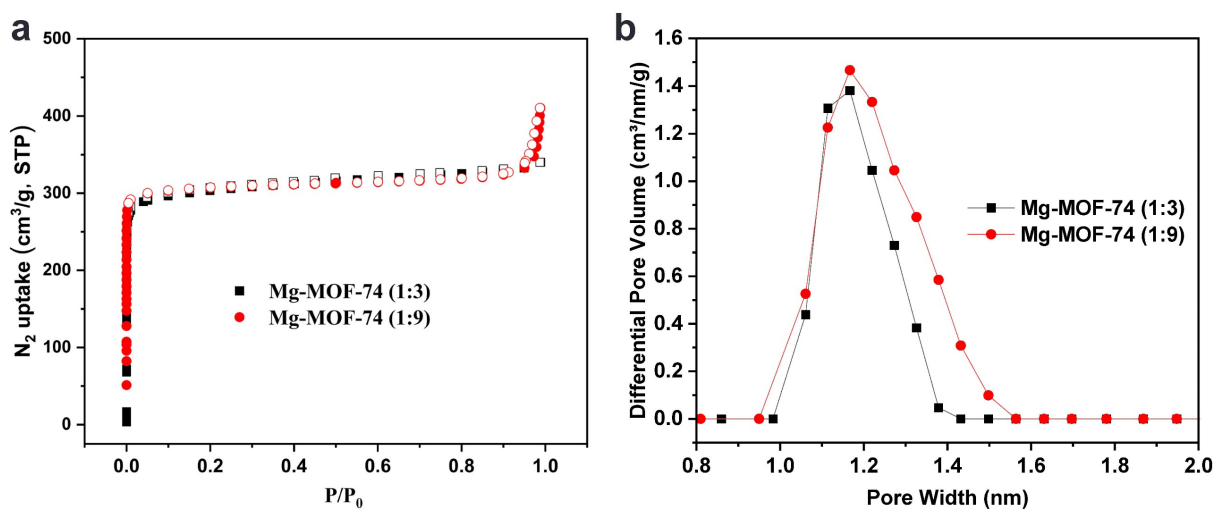

**Figure S2.** (a)  $N_2$  adsorption-desorption isotherms at 77 K of Mg-MOF-74(1:3) and Mg-MOF-74(1:9). (b) Pore size distribution of Mg-MOF-74(1:3) and Mg-MOF-74(1:9).

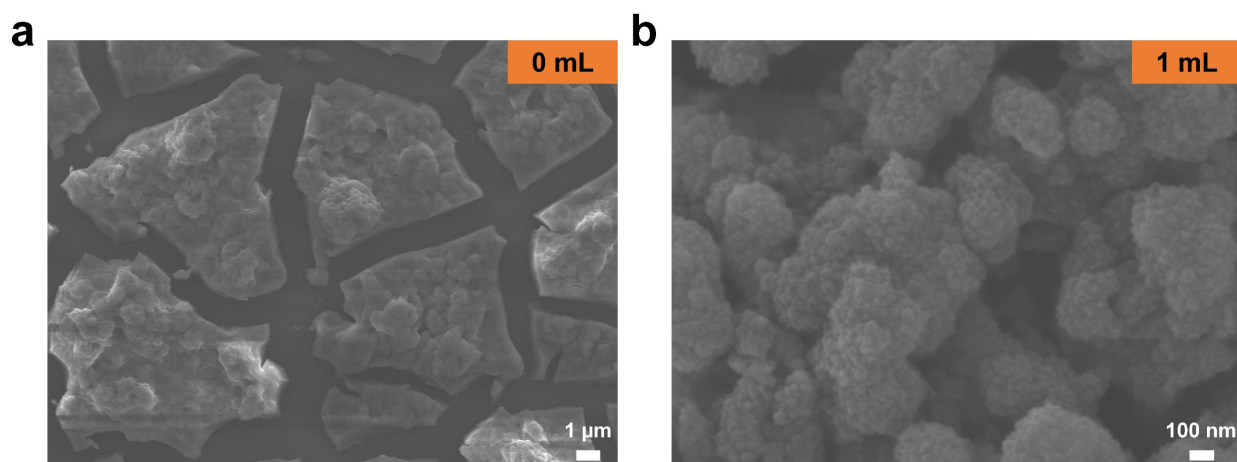

**Figure S3.** (a-b) SEM images of Mg-MOF-74 synthesized with various amounts of water.

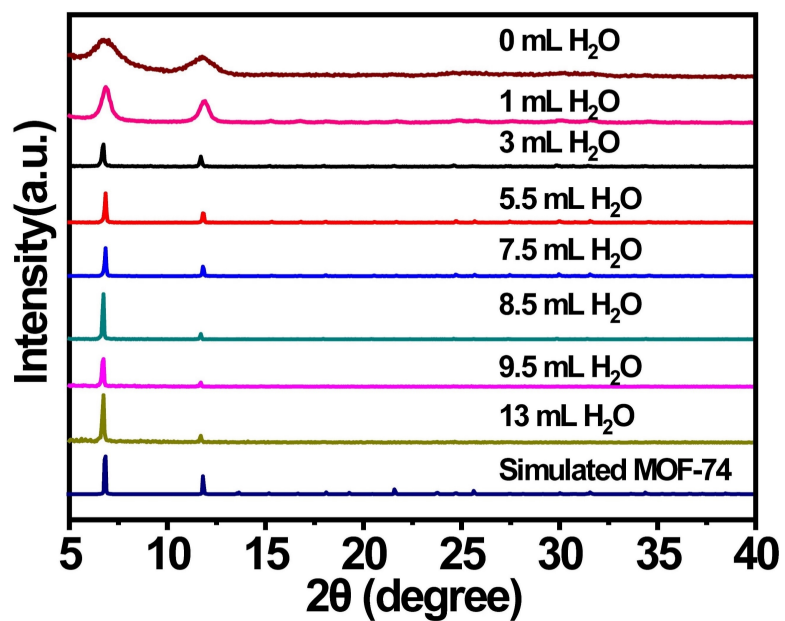

**Figure S4.** PXRD patterns of Mg-MOF-74 synthesized with various amounts of water.

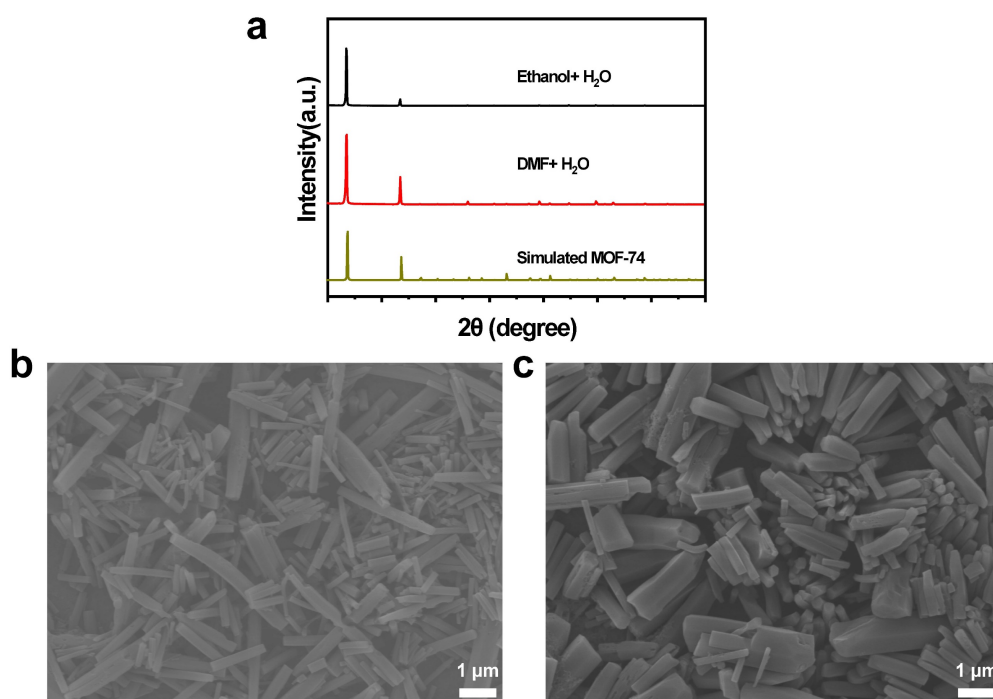

**Figure S5.** (a) PXRD patterns of Mg-MOF-74 synthesized with the absence of ethanol or DMF. SEM images of Mg-MOF-74 synthesized with the absence of ethanol (b) or DMF (c).



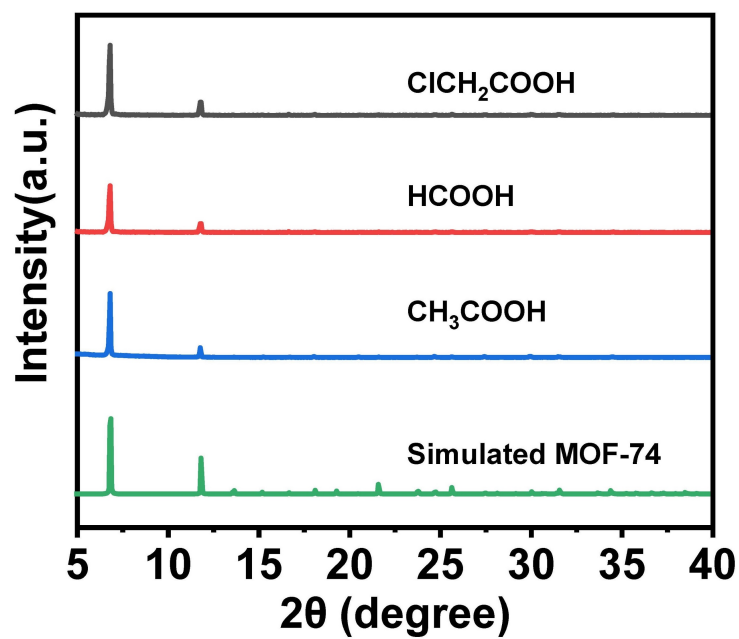

**Figure S6.** PXR D patterns of Mg-MOF-74 synthesized with capping agents of various acidity.

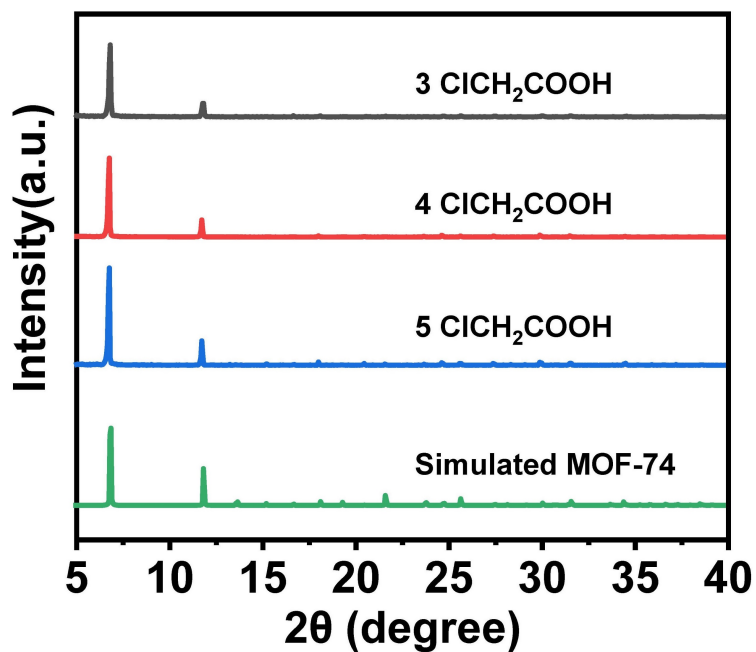

**Figure S7.** PXR D patterns of Mg-MOF-74 synthesized with different amounts of chloroacetic acid.

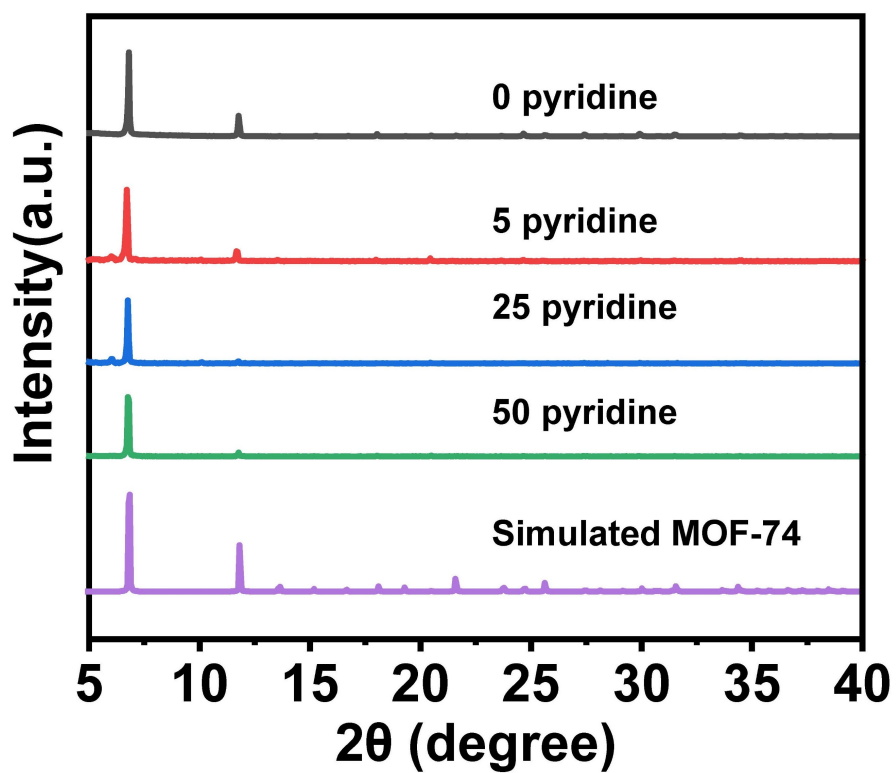

**Figure S8.** PXRD patterns of Mg-MOF-74 synthesized with different amounts of pyridine.
